# Supplementary material
Source: PubMed Central journal article supplement (PMC8222707)
Supplement: NIHMS1710760-supplement-1710760_Supp_Fig1.pdf [file NIHMS1710760-supplement-1710760_Supp_Fig1.pdf]

**Supplemental Figure 1. Examples of medications and jurisdictions covered by the new LCDs.**

| Drug             | Gene(d)         | Drug                        | Gene(s)       | Drug             | Gene(s)                |
|------------------|-----------------|-----------------------------|---------------|------------------|------------------------|
| abacavir*        | HLA-B           | isoflurane*                 | CACNA1S, RYR1 | phenytoin*       | CYP2C9, HLA-B          |
| allopurinol      | HLA-B           | ivacaftor*                  | CFTR          | piroxicam*       | CYP2C9                 |
| amitriptyline    | CYP2C19, CYP2D6 | lansoprazole                | CYP2C19       | rasburicase*     | G6PD                   |
| atazanavir       | UGT1A1          | lornoxiam                   | CYP2C9        | sertraline       | CYP2C19                |
| atomoxetine*     | CYP2D6          | meloxicam*                  | CYP2C9        | sevoflurane*     | CACNA1S, RYR1          |
| azathioprine*    | TPMT, NUDT15    | mercaptopurine*             | TPMT, NUDT15  | simvastatin      | SLCO1B1                |
| capecitabine*    | DPYD            | methoxyflurane              | CACNA1S, RYR1 | succinylcholine* | CACNA1S, RYR1          |
| carbamazepine*   | HLA-A, HLA-B    | nortriptyline*              | CYP2D6        | tacrolimus       | CYP3A5                 |
| celecoxib*       | CYP2C9          | omeprazole*                 | CYP2C19       | tamoxifen*       | CYP2D6                 |
| citalopram*      | CYP2C19         | ondansetron                 | CYP2D6        | tenoxicam        | CYP2C9                 |
| clomipramine     | CYP2C19, CYP2D6 | oxcarbazepine*              | HLA-B         | thioguanine*     | TPMT, NUDT15           |
| clopidogrel*     | CYP2C19         | pantoprazole*               | CYP2C19       | trimipramine     | CYP2C19, CYP2D6        |
| codeine*         | CYP2D6          | paroxetine                  | CYP2D6        | voriconazole*    | CYP2C19                |
| desflurane*      | CACNA1S, RYR1   | peginterferon alfa-2a or 2b | IFNL3         | warfarin*†       | CYP2C9, CYP4F2, VKORC1 |
| desipramine*     | CYP2D6          |                             |               |                  |                        |
| dexlansoprazole* | CYP2C19         |                             |               |                  |                        |
| doxepin*         | CYP2C19, CYP2D6 |                             |               |                  |                        |
| efavirenz*       | CYP2B6          |                             |               |                  |                        |
| enflurane*       | CACNA1S, RYR1   |                             |               |                  |                        |
| escitalopram*    | CYP2C19         |                             |               |                  |                        |
| fluorouracil*    | DPYD            |                             |               |                  |                        |
| flurbiprofen*    | CYP2C9          |                             |               |                  |                        |
| fluvoxamine*     | CYP2D6          |                             |               |                  |                        |
| halothane        | CACNA1S, RYR1   |                             |               |                  |                        |
| ibuprofen        | CYP2C9          |                             |               |                  |                        |
| imipramine       | CYP2C19, CYP2D6 |                             |               |                  |                        |

The figure includes gene/drug pairs that are actionable and included in CPIC guidelines as of August 1, 2020; \* indicates drugs for which FDA label considers genetic testing actionable, recommended, or required. † warfarin coverage is limited in a separate MoIDx LCD (A55179). Source: <https://cpicpgx.org/genes-drugs/>.

States within MoIDx jurisdictions (shaded green) as well as those that are outside of the MoIDx [CT, IL, NH, MA, ME, MN, NY, WI, RI, and VT (administered by NGS); AR, CO, DE, LA, MD, MS, NJ, NM, OK, PA, and TX (administered by Novitas), and FL (administered by First Coast)] are shown.

Map used with permission from P.E./PharmGKB.
